# Supplementary material
Source: PubMed Central journal article supplement (PMC2268547)

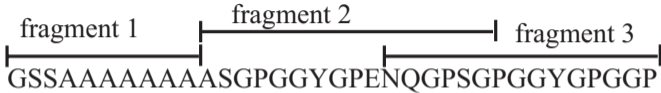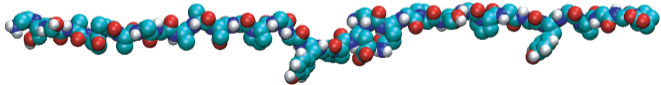

Supplement: pnas_0707879105_1.pdf [file pnas_0707879105_1.pdf]

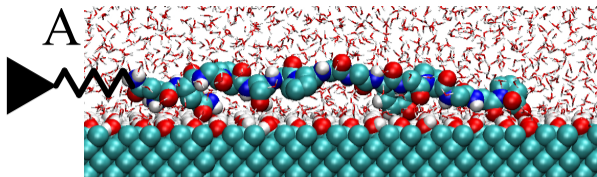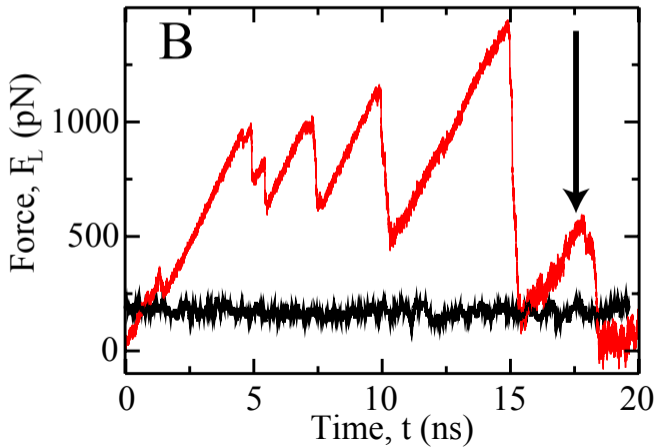

Supplement: pnas_0707879105_2.pdf [file pnas_0707879105_2.pdf]
